# Supplementary material for: Cu-exchanged RTH-type zeolites for NH3-selective catalytic reduction of NOx: Cu distribution and hydrothermal stability
Source: Royal Society of Chemistry journal article supplement (doi:10.1039/c8cy01933a), 2018-11-13
Supplement: c8cy01933a1.pdf [file c8cy01933a1.pdf]

**Electronic Supplementary Information:**

**Cu-exchanged RTH-type zeolites for NH<sub>3</sub>-selective catalytic  
reduction of NO<sub>x</sub>: Cu distribution and hydrothermal stability**

*Yulong Shan<sup>a,b</sup>, Xiaoyan Shi<sup>a,b</sup>, Jinpeng Du<sup>a,b</sup>, Yunbo Yu<sup>a,b,c</sup>, Hong He<sup>a,b,c,\*</sup>*

<sup>a</sup> State Key Joint Laboratory of Environment Simulation and Pollution Control,  
Research Center for Eco-Environmental Sciences, Chinese Academy of Sciences,  
Beijing, 100085, China.

<sup>b</sup> University of Chinese Academy of Sciences, Beijing 100049, China.

<sup>c</sup> Center for Excellence in Regional Atmospheric Environment, Institute of Urban  
Environment, Chinese Academy of Sciences, Xiamen 361021, China.

\*Corresponding author at: State Key Joint Laboratory of Environment Simulation and  
Pollution Control, Research Center for Eco-environmental Sciences, Chinese Academy  
of Sciences, 18 ShuangQing Road, Haidian District, Beijing, 100085, China.

Tel: +86 10 62849123; Fax: +86 10 62849123.

E-mail: [honghe@rcees.ac.cn](mailto:honghe@rcees.ac.cn)

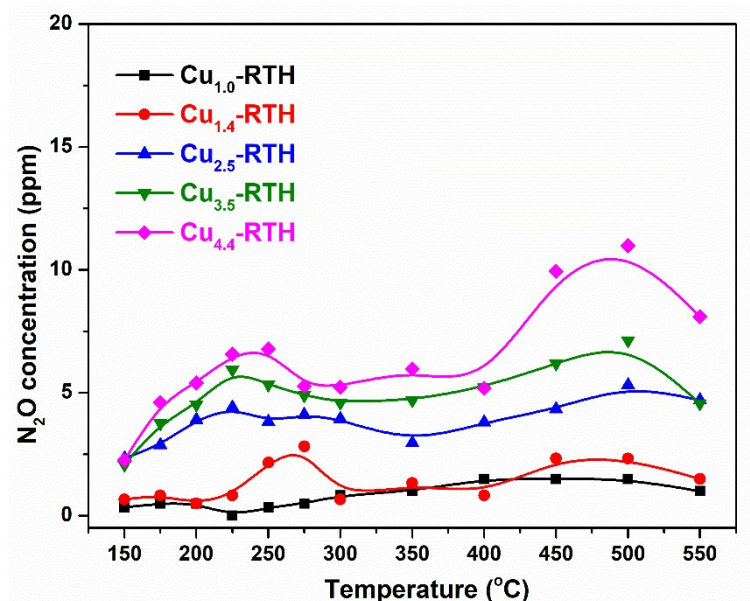

**Fig. S1** N<sub>2</sub>O production of Cu-RTH catalysts with different Cu loadings in the NH<sub>3</sub>-SCR reaction. Conditions: 500 ppm NO, 500 ppm NH<sub>3</sub>, 5% O<sub>2</sub>, 5% H<sub>2</sub>O and balanced with N<sub>2</sub>. GHSV = 100,000 h<sup>-1</sup>.

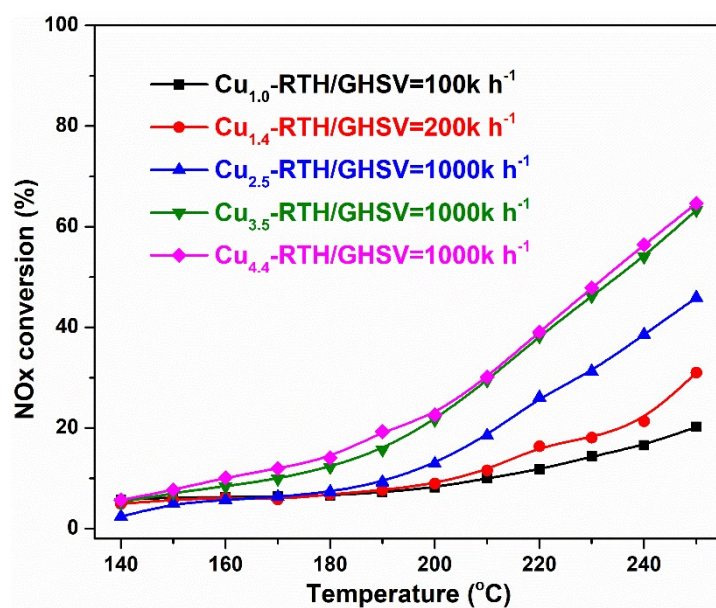

**Fig. S2.** NO<sub>x</sub> conversion of Cu-RTH catalysts with different Cu loadings in the NH<sub>3</sub>-SCR reaction with varying GHSVs. conditions: 500 ppm of NO, 500 ppm of NH<sub>3</sub>, 5% O<sub>2</sub>, 5% H<sub>2</sub>O and balanced with N<sub>2</sub>.

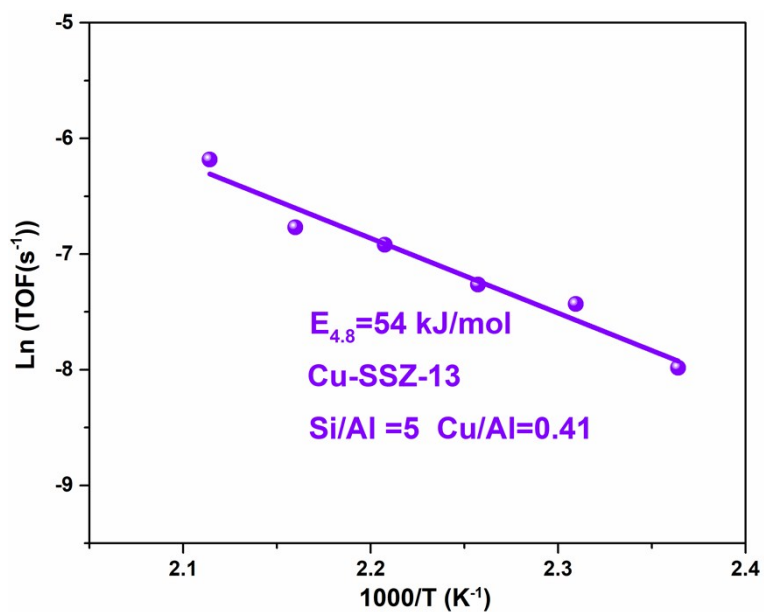

29

30 **Fig. S3.** Arrhenius plots of NO<sub>x</sub> conversion over Cu-SSZ-13 catalyst with Cu loadings  
31 of 4.8 wt.%.

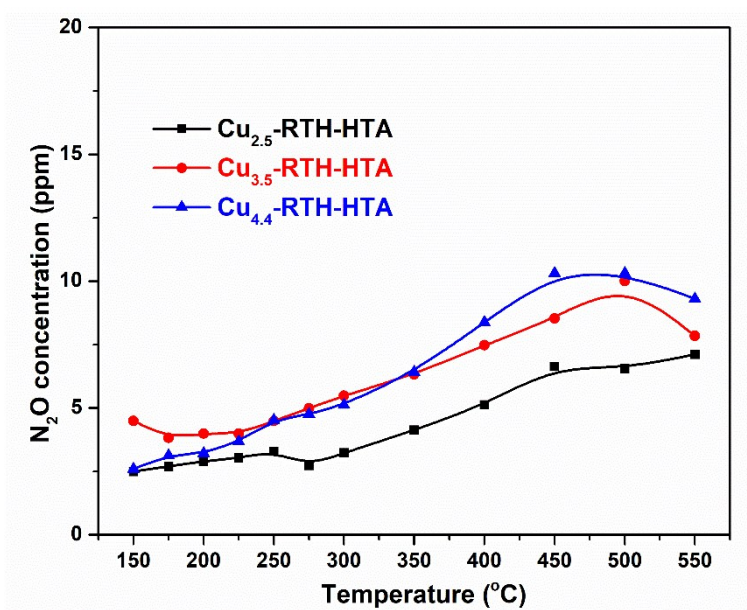

32

33 **Fig. S4.** N<sub>2</sub>O production of hydrothermally aged Cu-RTH catalysts with different Cu loadings in  
34 the NH<sub>3</sub>-SCR reaction. Conditions: 500 ppm of NO, 500 ppm of NH<sub>3</sub>, 5% O<sub>2</sub>, 5% H<sub>2</sub>O and  
35 balanced with N<sub>2</sub>. GHSV = 100,000 h<sup>-1</sup>.

36

37

38

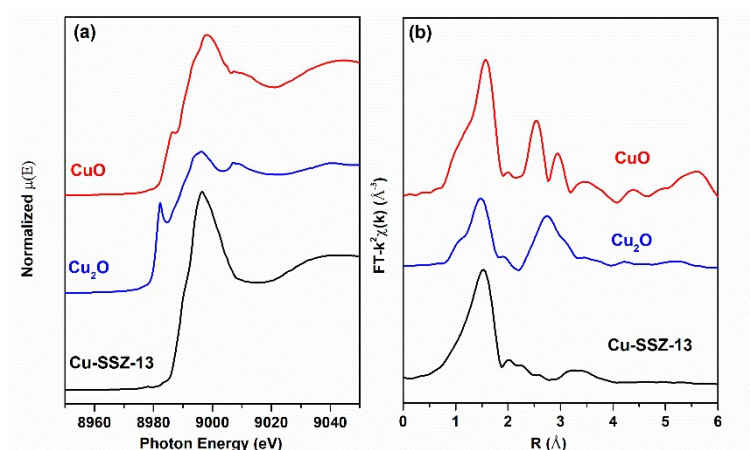

**Fig. S5.** Cu K-edge XANES spectra (a) and associated Fourier transform of the EXAFS spectra (b) of referenced materials.

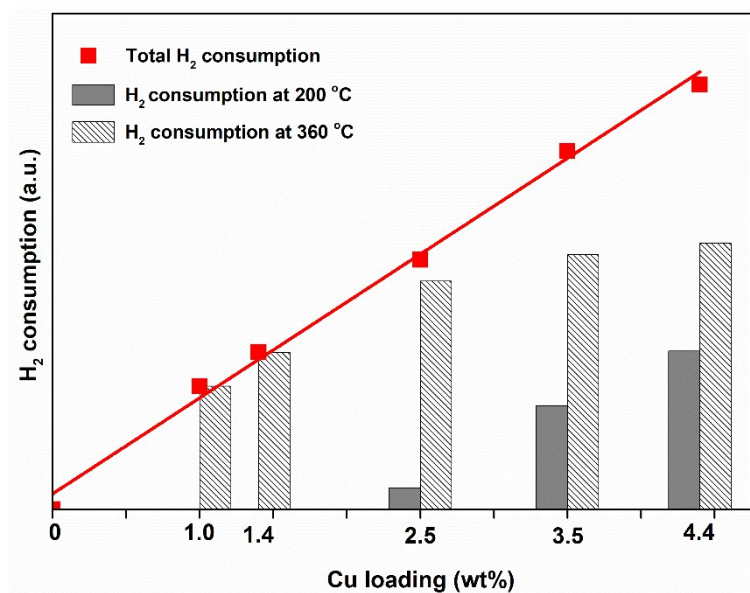

**Fig. S6.**  $\text{H}_2$  consumption intensity in  $\text{H}_2$ -TPR profiles as a function of Cu loading.

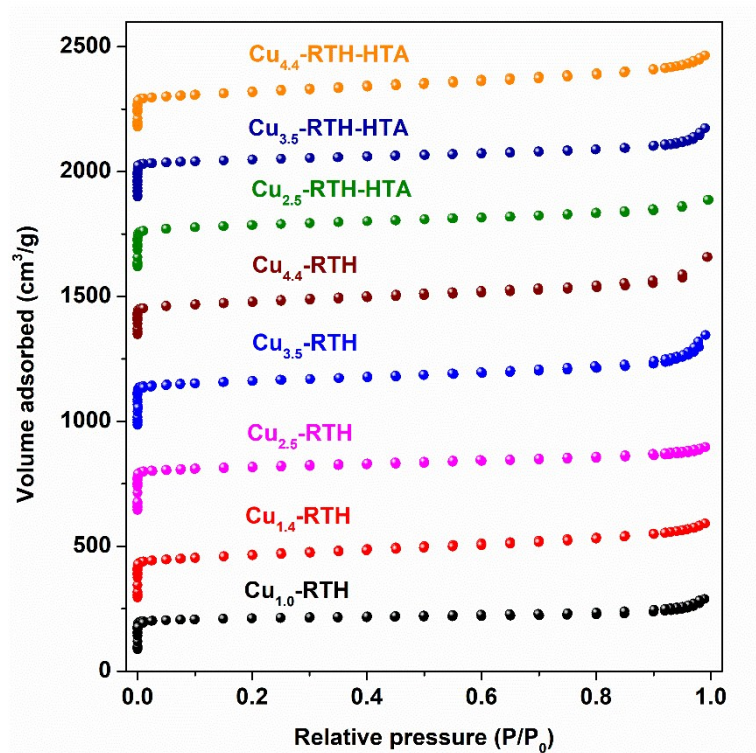

**Fig. S7.** N<sub>2</sub> adsorption-desorption isotherms of Cu-RTH and Cu-RTH-HTA with different Cu loadings.



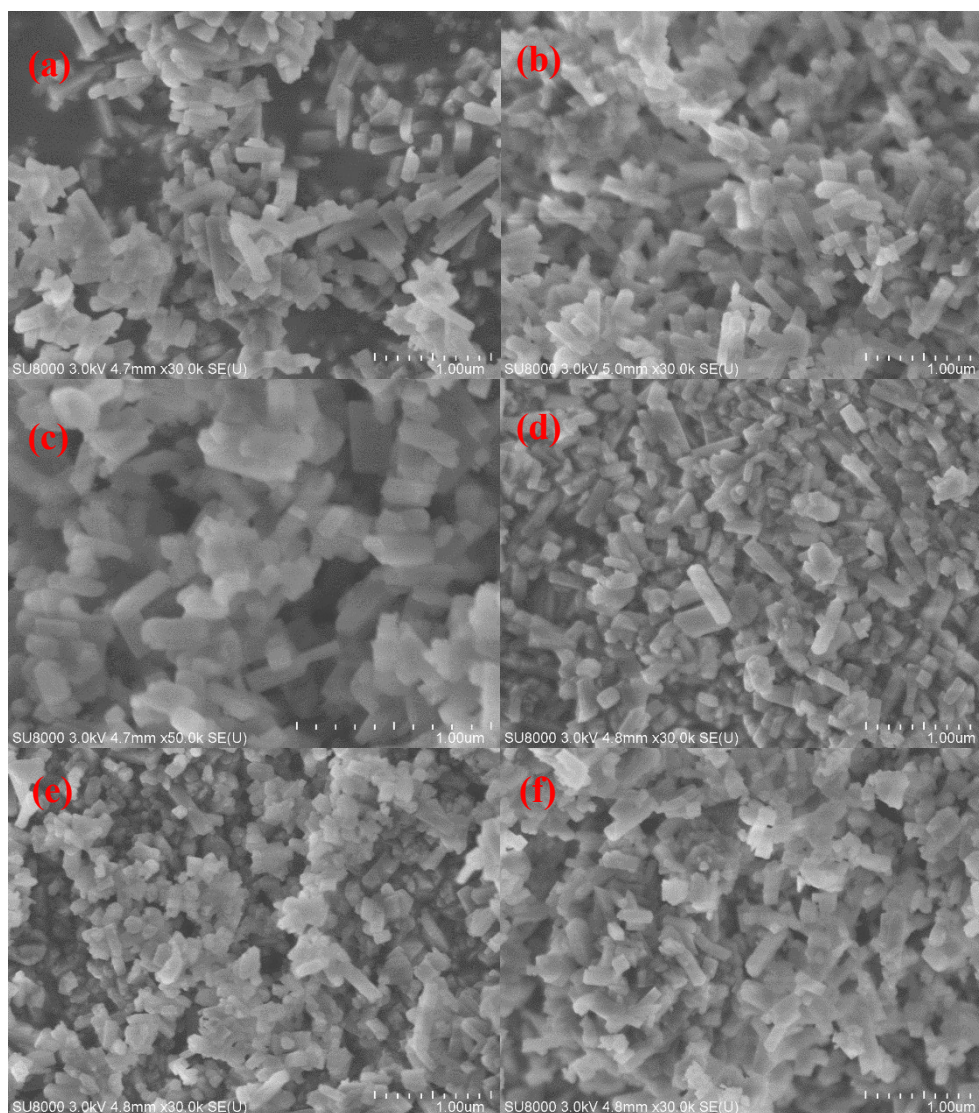

66  
 67 **Fig. S8.** SEM images of the fresh and hydrothermally aged Cu-RTH catalysts with  
 68 different Cu loadings: (a) Cu<sub>2.5</sub>-RTH, (b) Cu<sub>2.5</sub>-RTH-HTA, (c) Cu<sub>3.5</sub>-RTH, (d) Cu<sub>3.5</sub>-RTH-HTA, (e)  
 69 Cu<sub>4.4</sub>-RTH, (f) Cu<sub>4.4</sub>-RTH-HTA

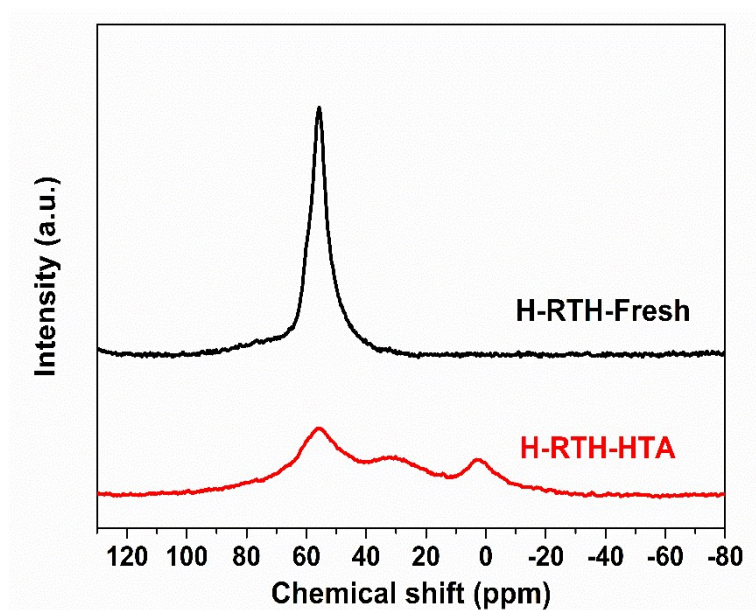

70  
71  
72  
73

**Fig. S9.**  $^{27}\text{Al}$ -NMR profiles of fresh and hydrothermally aged H-RTH zeolites.

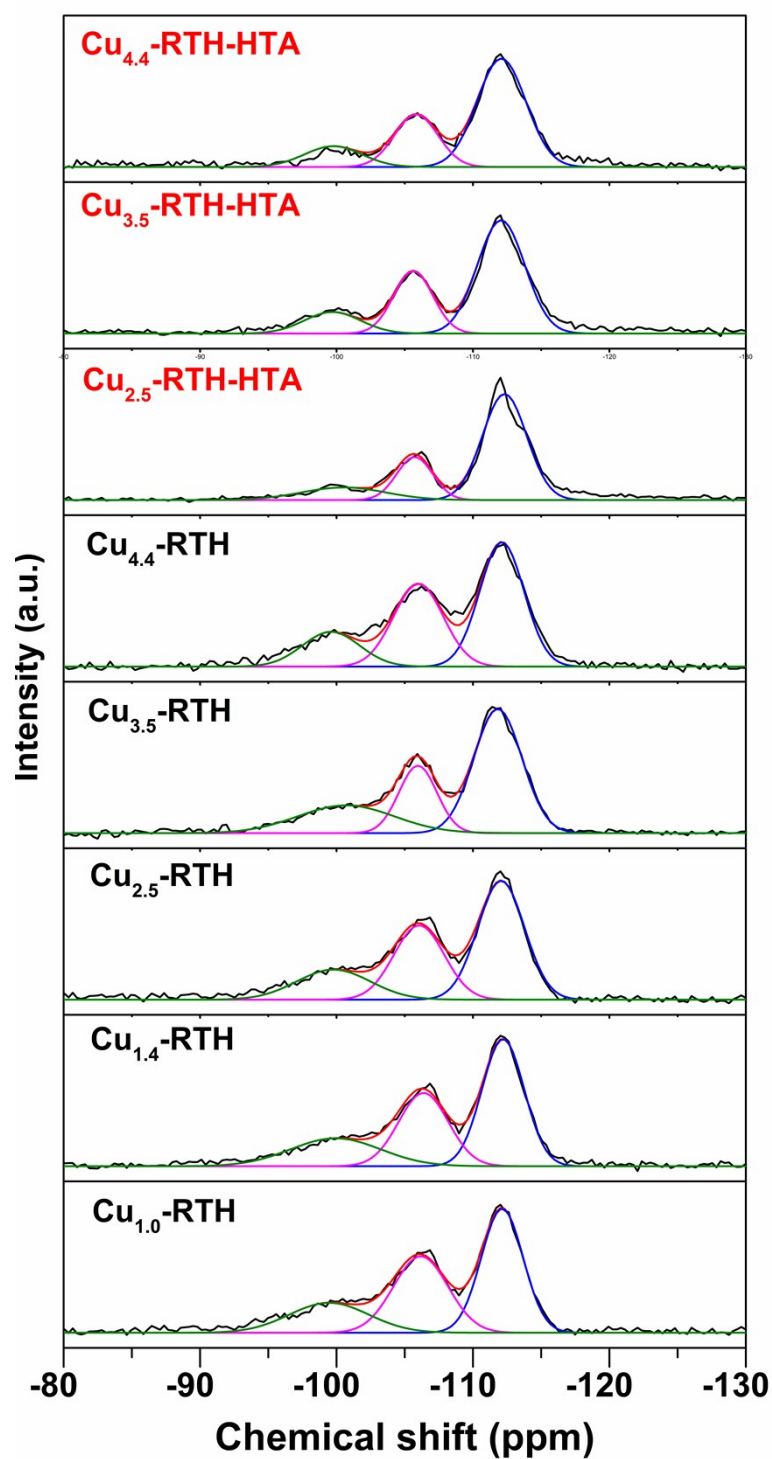

74

75

76 **Fig. S10.** Deconvolution of  $^{29}\text{Si}$ -NMR profiles over fresh and hydrothermally aged Cu-  
 77 RTH catalysts with different Cu loadings.

78

79

80

81



82 **Table S1** EAXFS fitting parameters for Cu-RTH and Cu-SSZ-13 catalysts.

| Sample                     | Pair | CN        | R (Å)       | $\Delta E$ | $\sigma^2$ (Å <sup>2</sup> ) | R factor |
|----------------------------|------|-----------|-------------|------------|------------------------------|----------|
| Cu <sub>1.0</sub> -RTH     | Cu-O | 3.6 ± 0.1 | 1.95 ± 0.01 | -3.7 ± 0.5 | 0.0049 ± 0.0004              | 0.0009   |
| Cu <sub>1.4</sub> -RTH     | Cu-O | 3.5 ± 0.2 | 1.95 ± 0.01 | -3.7 ± 0.7 | 0.0047 ± 0.0007              | 0.0033   |
| Cu <sub>2.5</sub> -RTH     | Cu-O | 3.5 ± 0.2 | 1.95 ± 0.01 | -3.6 ± 0.7 | 0.0049 ± 0.0006              | 0.0024   |
| Cu <sub>3.5</sub> -RTH     | Cu-O | 3.6 ± 0.1 | 1.95 ± 0.01 | -3.7 ± 0.4 | 0.0049 ± 0.0004              | 0.0011   |
| Cu <sub>4.4</sub> -RTH     | Cu-O | 3.7 ± 0.1 | 1.95 ± 0.01 | -3.2 ± 0.5 | 0.0050 ± 0.0005              | 0.0043   |
| Cu <sub>2.5</sub> -RTH-HTA | Cu-O | 3.8± 0.3  | 1.96 ± 0.01 | -6.3 ± 1.0 | 0.0052 ± 0.0009              | 0.0053   |
| Cu <sub>3.5</sub> -RTH-HTA | Cu-O | 3.8± 0.3  | 1.94 ± 0.01 | -6.1 ± 1.0 | 0.0054 ± 0.0009              | 0.0051   |
| Cu <sub>4.4</sub> -RTH-HTA | Cu-O | 3.5± 0.2  | 1.96 ± 0.01 | -2.3 ± 0.7 | 0.0055 ± 0.0007              | 0.0067   |

83 CN: coordination number; R: distance over first shell;  $\Delta E$ : edge position  $\sigma$ : Debye-Waller factor.

84
